## Bacteraemia due to multidrug-resistant Gram-negative bacilli in cancer patients: risk factors, antibiotic therapy and outcomes

C. Gudiol<sup>1,2\*</sup>, F. Tubau<sup>3,4</sup>, L. Calatayud<sup>3,4</sup>, C. Garcia-Vidal<sup>1,2</sup>, M. Cisnal<sup>3</sup>, I. Sánchez-Ortega<sup>5</sup>, R. Duarte<sup>5</sup>, M. Calvo<sup>6</sup> and J. Carratalà<sup>1,2</sup>

<sup>1</sup>Infectious Disease Department, Hospital Universitari de Bellvitge, Insitut d'Investigació Biomèdica de Bellvitge (IDIBELL), University of Barcelona, l'Hospitalet de Llobregat, Barcelona, Spain; <sup>2</sup>REIPI (Spanish Network for Research in Infectious Disease), Instituto de Salud Carlos III, Madrid, Spain; <sup>3</sup>Microbiology Department, Hospital Universitari de Bellvitge, Insitut d'Investigació Biomèdica de Bellvitge (IDIBELL), University of Barcelona, l'Hospitalet de Llobregat, Barcelona, Spain; <sup>4</sup>Ciber de Enfermedades Respiratorias, Instituto de Salud Carlos III, Madrid, Spain; <sup>5</sup>Haematology Department, Hospital Duran i Reynals, Insitut d'Investigació Biomèdica de Bellvitge (IDIBELL), University of Barcelona, l'Hospitalet de Llobregat, Barcelona, Spain; <sup>6</sup>Oncology Department, Hospital Duran i Reynals, Insitut d'Investigació Biomèdica de Bellvitge (IDIBELL), University of Barcelona, l'Hospitalet de Llobregat, Barcelona, Spain

\*Corresponding author. Infectious Disease Department, Hospital Universitari de Bellvitge, Feixa Llarga s/n, 08907 L'Hospitalet de Llobregat, Barcelona, Spain. Tel: +34-932607625; Fax: +34-932607637; E-mail: cgudiol@iconcologia.net

Received 29 September 2010; returned 5 November 2010; revised 24 November 2010; accepted 29 November 2010

**Objectives:** To assess the risk factors, antibiotic therapy and outcomes of multidrug-resistant Gram-negative bacilli (MDRGNB) bacteraemia in hospitalized patients with cancer.

**Methods:** Episodes of MDRGNB bacteraemia were compared with a susceptible control group in a 4 year prospective study.

**Results:** Of 747 bacteraemias, 372 (49.7%) were caused by a Gram-negative bacilli (GNB). Fifty-one of these (13.7%) were caused by a multidrug-resistant (MDR) strain. Previous antibiotics [odds ratio (OR) 3.57; 95% confidence interval (CI) 1.63–7.80] and urinary catheter (OR 2.41; 95% CI 1.01–5.74) were identified as independent risk factors for MDRGNB acquisition. The most frequent mechanism of resistance was extended-spectrum  $\beta$ -lactamase (ESBL) production (45%), mainly by *Escherichia coli*, followed by Amp-C cephalosporinase hyperproduction (24%). Patients with MDRGNB bacteraemia more frequently received inadequate initial antibiotic therapy (69% versus 9%;  $P < 0.001$ ) and time to adequate therapy was longer in this group (41% versus 4%;  $P < 0.001$ ). Patients in the resistant group more frequently required intensive care unit (ICU) admission (14% versus 5%;  $P = 0.023$ ), had greater need for mechanical ventilation (14% versus 3%;  $P = 0.005$ ) and had a higher overall case-fatality rate (41% versus 21%;  $P = 0.003$ ). Risk factors for mortality were solid tumour (OR 5.04; 95% CI 2.49–10.19), current corticosteroid use (OR 4.38; 95% CI 2.39–8.05), ICU admission (OR 11.40; 95% CI 3.19–40.74) and MDRGNB bacteraemia (OR 3.52; 95% CI 1.36–9.09).

**Conclusions:** MDRGNB bacteraemia was common among cancer patients, especially in those exposed to antibiotics and urinary catheter. The most frequent mechanism of resistance was ESBL production. Patients with MDRGNB more frequently received inadequate empirical antibiotic therapy and presented poorer outcomes with a higher overall case-fatality rate (within 30 days).

**Keywords:** bloodstream infection, immunosuppression, neutropenia, antibiotic resistance

### Introduction

Bacteraemia is a common complication in immunosuppressed patients with cancer receiving chemotherapy and in stem cell transplant recipients, and is associated with high morbidity and mortality rates. The epidemiology of bacteraemia in cancer patients occurring during neutropenia has changed in the past

decades, with the re-emergence of Gram-negative bacilli (GNB) as the leading causative agents. The development of multidrug resistance among these organisms has become a major health problem worldwide. This problem is of particular concern among immunosuppressed patients with cancer, who are at especially high risk for severe sepsis and poor outcome. Treatment of infections due to multidrug-resistant GNB (MDRGNB) is

a clinical challenge. Nevertheless, information regarding risk factors for MDRGNB bacteraemia in immunosuppressed patients with cancer and its outcome is scarce and dispersed. The aim of the present prospective study is to assess the frequency, risk factors, antibiotic therapy and outcomes of MDRGNB bacteraemia in cancer patients.

## Methods

### Setting, patients and study design

We conducted a prospective observational study in a 200-bed university referral cancer centre for adults in Barcelona, Spain. From January 2006 to December 2009 all hospitalized cancer patients and haematopoietic stem cell transplant (HSCT) recipients with at least one episode of bacteraemia were included in the study. Information on baseline characteristics, clinical features, empirical antibiotic therapy and outcomes was carefully recorded in a specific database.

For the purposes of this study, patients were divided into two groups: patients with bacteraemia due to a MDRGNB and those with bacteraemia due to a susceptible GNB (henceforth 'MDRGNB' and 'non-MDRGNB'). The two groups were compared in order to identify risk factors for multidrug-resistant (MDR) infection. We also compared

patients who died with those who survived in order to determine the independent factors influencing mortality. All bacteraemia episodes at our hospital are reported and followed up by an infectious disease physician; some have been described previously.<sup>1</sup> Changes in antimicrobial treatment and general management were advised when necessary. During the study period, no antibacterial prophylaxis to prevent bacterial infections was administered to patients with neutropenia. The study was approved by the ethics committee of our institution.

### Definitions

Patients were considered to have a MDR infection in the following situations: (i) extended-spectrum  $\beta$ -lactamase (ESBL)-producing Enterobacteriaceae; (ii) AmpC cephalosporinase hyperproducing Enterobacteriaceae; (iii)  $\beta$ -lactamase OXA-type-producing Enterobacteriaceae; (iv) microorganisms with intrinsic resistance mechanisms such as *Stenotrophomonas maltophilia*; and (v) MDR strains including *Pseudomonas aeruginosa* and *Acinetobacter baumannii*. MDR strains were defined as those resistant to three or more classes of antibiotics: carbapenems (imipenem and meropenem); penicillins (piperacillin, ticarcillin and piperacillin/tazobactam); cephalosporins (ceftazidime and cefepime); monobactams; aminoglycosides; and fluorquinolones.<sup>2</sup> In cases of

**Table 1.** Baseline and demographic characteristics of all episodes of GNB bacteraemia in cancer patients

| Characteristic                                         | MDRGNB,<br>N=51,<br>n (%) | Non-MDRGNB,<br>N=312, n (%) | P      |
|--------------------------------------------------------|---------------------------|-----------------------------|--------|
| Male sex                                               | 29 (57)                   | 198 (63.5)                  | 0.43   |
| Age in years, median (range)                           | 62 (23–89)                | 62 (14–89)                  | 0.52   |
| Underlying disease                                     |                           |                             |        |
| solid tumour                                           | 23 (45)                   | 158 (51)                    | 0.54   |
| haematological malignancy                              | 28 (55)                   | 154 (49)                    |        |
| HSCT                                                   | 2 (4)                     | 26 (8)                      | 0.39   |
| Graft-versus-host disease                              | 0                         | 9 (3)                       | 0.62   |
| Co-morbidities                                         | 27 (53)                   | 114 (36.5)                  | 0.030  |
| diabetes mellitus                                      | 10 (20)                   | 50 (16)                     | 0.54   |
| chronic obstructive pulmonary disease                  | 4 (8)                     | 29 (9)                      | 1.00   |
| chronic heart disease                                  | 9 (18)                    | 33 (11)                     | 0.15   |
| chronic renal failure                                  | 2 (4)                     | 8 (3)                       | 0.63   |
| chronic liver disease                                  | 4 (8)                     | 16 (5)                      | 0.50   |
| Previous anti-neoplastic chemotherapy (within 1 month) | 37 (72.5)                 | 213 (68)                    | 0.62   |
| Neutropenia (<500 neutrophils/ $\mu$ L)                | 15 (29)                   | 130 (42)                    | 0.12   |
| Previous radiotherapy (within 1 month)                 | 3 (6)                     | 31 (10)                     | 0.44   |
| Current corticosteroid therapy                         | 17 (33)                   | 132 (42)                    | 0.28   |
| Previous antibiotic therapy (within 1 month)           | 39 (76)                   | 139 (45)                    | <0.001 |
| Urinary catheter                                       | 13 (26)                   | 32 (10)                     | 0.004  |
| Intravascular catheter                                 | 30 (59)                   | 161 (52)                    | 0.36   |
| Parenteral nutrition                                   | 4 (8)                     | 3 (1)                       | 0.009  |
| Previous surgery (within 1 month)                      | 1 (2)                     | 14 (4.5)                    | 0.70   |
| Previous ICU admission (within 3 months)               | 8 (16)                    | 10 (3)                      | 0.001  |
| invasive mechanical ventilation (within 7 days)        | 3 (6)                     | 0                           | 0.003  |
| Previous hospital admission (within 3 months)          | 32 (63)                   | 170 (54.5)                  | 0.29   |
| Healthcare-related acquisition                         | 49 (96)                   | 282 (90)                    | 0.28   |
| Previous blood transfusion (within 5 days)             | 14 (28)                   | 48 (15)                     | 0.043  |
| Previous episode of bacteraemia                        | 8 (16)                    | 13 (4)                      | 0.004  |

polymicrobial bacteraemia caused by a MDRGNB and a non-MDRGNB isolate, the episode was defined as a case.

Neutropenia was defined as an absolute neutrophil count  $<500/\text{mm}^3$ . Bacteraemia was considered to be nosocomially acquired, healthcare related or community acquired, applying the criteria described previously.<sup>3</sup> Current corticosteroid therapy was recorded when a patient was receiving corticosteroids at the time of the episode of bacteraemia or in the previous month. Prior antibiotic therapy was defined as the receipt of any systemic antibiotic  $>48$  h in the preceding 30 days. Bacteraemia was considered to be from an endogenous source in neutropenic patients in whom no other bacteraemia sites were identified. Shock was defined as a systolic pressure  $<90$  mmHg that was unresponsive to fluid treatment or required vasoactive drug therapy.<sup>4</sup> Empirical antibiotic therapy was considered inadequate if the treatment regimen did not include at least one antibiotic active *in vitro* against the infecting microorganism. In patients with ESBL-*Escherichia coli* (ESBL-EC), bacteraemia treatment with an oxyimino  $\beta$ -lactam (combined or not with an aminoglycoside) was considered inadequate, regardless of the MIC. Early case-fatality rate was defined as death within 7 days of the bacteraemia episode. Overall case-fatality rate was defined as death by any cause within the first 30 days of the onset of bacteraemia.

### Microbiological studies

Identification of microorganisms and susceptibility testing were performed using commercial panels CN1S from the MicroScan automated system (Siemens Healthcare Diagnostics Ltd). CLSI criteria were used to define susceptibility or resistance to antimicrobial agents.<sup>5</sup> ESBL production was screened and confirmed in all isolates with a profile suggestive of resistance by performing a double-disc synergy test in accordance with CLSI guidelines.<sup>6</sup> Carbapenemase production was investigated in carbapenem-resistant strains with non-intrinsic resistance to carbapenems, performing a modified Hodge method as described in the CLSI guidelines, and a double-disc synergy test with EDTA discs for metallo- $\beta$ -lactamase screening.<sup>6,7</sup> ESBLs were characterized by a multiplex PCR. The presence of *bla*<sub>TEM</sub>, *bla*<sub>SHV</sub>, *bla*<sub>CTX-M</sub> and *bla*<sub>OXA</sub> in each organism was studied by PCR, as described previously.<sup>8</sup> Molecular characterization of ESBL-EC was performed by macrorestriction analysis of genomic DNA restricted with XbaI (New England Biolabs). DNA fragments were separated by PFGE in a CHEF-DR III system (Bio-Rad). Restriction patterns were analysed by applying previously established criteria.<sup>9</sup>

### Statistical analysis

Continuous variables were compared by the Mann-Whitney *U*-test and the *t*-test. Qualitative variables were compared by the  $\chi^2$  test; odds

ratios (ORs) and 95% confidence intervals (CIs) were calculated. Multivariate logistic regression analysis of factors potentially associated with MDRGNB acquisition and mortality included all statistically significant variables in univariate analysis, sex and age, and all clinically important variables, whether they were statistically significant or not.<sup>10</sup> Measures of goodness-of-fit were obtained to assess the performance of the models. The analysis was performed with the stepwise logistic regression model of the SPSS software package (SPSS).

### Results

During the study period 747 episodes of bacteraemia were recorded. Out of 372 (49.7%) episodes caused by GNB, 51 were due to a MDR strain (13.7%). Ten episodes of Gram-negative bacteraemia were excluded from the analysis because they occurred within less than 4 weeks after a first episode of GNB bacteraemia, and they were considered to be recurrent episodes (the causative microorganism was the same in both episodes). The outcomes of these 10 recurrent episodes were already analysed in the first episode. Thus 363 episodes were finally eligible for the analyses. In the control group, 27 patients presented more than one episode (312 episodes in 276 patients), whereas in the MDRGNB group there was one episode of bacteraemia per patient. The distribution of cases during the four-year study period did not suggest the occurrence of outbreaks.

The baseline and demographic characteristics of the patients according to the study group (MDRGNB and non-MDRGNB) are shown in Table 1. Variables such as age, sex, underlying disease and neutropenia were similar between groups. The presence of other co-morbidities, antibiotics in the previous month, urinary catheter, parenteral nutrition, previous intensive care unit (ICU) admission, invasive mechanical ventilation, previous blood transfusion and previous episode of bacteraemia were more frequently found among the MDRGNB group. After applying a logistic regression model (Table 2) the only independent risk factors for MDR acquisition were prior antibiotic exposure (OR 3.57; 95% CI 1.63–7.80) and urinary catheter (OR 2.41; 95% CI 1.01–5.74). The goodness-of-fit test of Hosmer and Lemeshow showed good agreement between observed and predicted values of the model ( $P=0.21$ ).

The 38 MDRGNB Enterobacteriaceae and their phenotypic  $\beta$ -lactam resistance profiles were, in order of frequency: *E. coli* ( $n=25$ ) [ESBL production ( $n=20$ ), AmpC cephalosporinase hyperproduction ( $n=2$ ) and  $\beta$ -lactamase OXA-1 production ( $n=3$ )]; *Enterobacter cloacae* ( $n=5$ ) [AmpC cephalosporinase

**Table 2.** Risk factors for MDRGNB acquisition by multivariate analysis

| Characteristic                  | MDRGNB, N=51, n (%) | Non-MDRGNB, N=312, n (%) | P        | Adjusted OR (95% CI) | P     |
|---------------------------------|---------------------|--------------------------|----------|----------------------|-------|
| Male sex                        | 29 (57)             | 198 (63.5)               | 0.43     | 1.81 (0.93–3.67)     | 0.078 |
| Age in years, median (range)    | 62 (23–89)          | 62 (14–89)               | 0.52     | 0.98 (0.99–1.03)     | 1.00  |
| Co-morbidities                  | 27 (53)             | 114 (36.5)               | 0.030    | 1.60 (0.77–3.33)     | 0.20  |
| Previous antibiotic therapy     | 39 (78)             | 139 (45)                 | $<0.001$ | 3.57 (1.63–7.80)     | 0.001 |
| Previous ICU admission          | 8 (16)              | 10 (3)                   | 0.001    | 2.11 (0.59–7.54)     | 0.24  |
| Urinary catheter                | 13 (26)             | 32 (10)                  | 0.004    | 2.41 (1.01–5.74)     | 0.047 |
| Parenteral nutrition            | 4 (8)               | 3 (1)                    | 0.009    | 2.67 (0.37–18.89)    | 0.32  |
| Previous blood transfusion      | 14 (28)             | 48 (16)                  | 0.043    | 1.55 (0.69–3.46)     | 0.27  |
| Previous episode of bacteraemia | 8 (16)              | 13 (4)                   | 0.004    | 2.28 (0.77–6.77)     | 0.13  |

hyperproduction ( $n=4$ ) and ESBL production ( $n=1$ ); *Enterobacter aerogenes* ( $n=3$ ) (AmpC cephalosporinase hyperproduction); *Klebsiella* spp. ( $n=3$ ) [*Klebsiella pneumoniae* ESBL production ( $n=2$ ) and *Klebsiella oxytoca* chromosomal  $\beta$ -lactamase hyperproduction ( $n=1$ )]; *Aeromonas hydrophila* ( $n=1$ ) (AmpC cephalosporinase hyperproduction); and *Morganella morganii* ( $n=1$ ) (AmpC cephalosporinase hyperproduction). Rates of resistance to non- $\beta$ -lactam antibiotics among ESBL-Enterobacteriaceae were as follows: gentamicin 13% (3/23), tobramycin 13% (3/23), ciprofloxacin 91.3% (21/23) and co-trimoxazole 56.5% (13/23). All strains were susceptible to amikacin and carbapenems. The ESBLs were characterized in 19 available strains: 14 from the CTX-M family, 3 from the SHV family and 2 from the TEM family (TEM-52). All the ESBL-Enterobacteriaceae strains were shown to be different by PFGE. The 13 remaining MDRGNB non-Enterobacteriaceae were, in order of frequency: *P. aeruginosa* ( $n=7$ ), *A. baumannii* ( $n=3$ ) and *S. maltophilia* ( $n=3$ ). Five *P. aeruginosa* and all *A. baumannii*

**Table 3.** Clinical features, antibiotic treatment and outcome of patients with MDRGNB bacteraemia compared with the susceptible control group

| Characteristic                                               | MDRGNB, N=51,<br>n (%) | Non-MDRGNB, N=312,<br>n (%) | P      |
|--------------------------------------------------------------|------------------------|-----------------------------|--------|
| Clinical features                                            |                        |                             |        |
| axillary temperature $\geq 38^{\circ}\text{C}$               | 40 (78)                | 251 (80)                    | 0.85   |
| source of bacteraemia                                        |                        |                             |        |
| endogenous bacteraemia                                       | 13 (25.5)              | 110 (35)                    | 0.20   |
| urinary tract                                                | 12 (23.5)              | 66 (21)                     | 0.71   |
| cholangitis                                                  | 12 (23.5)              | 52 (17)                     | 0.23   |
| gastrointestinal tract                                       | 3 (6)                  | 36 (11.5)                   | 0.32   |
| pneumonia                                                    | 2 (4)                  | 13 (4)                      | 1.00   |
| spontaneous bacterial peritonitis                            | 0                      | 3 (1)                       | 1.00   |
| other <sup>a</sup>                                           | 3 (6)                  | 9 (3)                       | 0.23   |
| unknown origin                                               | 6 (12)                 | 23 (7)                      | 0.27   |
| polymicrobial bacteraemia                                    | 6 (12)                 | 38 (12)                     | 1.00   |
| concomitant infection <sup>b</sup>                           | 5 (10)                 | 11 (3.5)                    | 0.056  |
| shock at presentation                                        | 5 (10)                 | 39 (12.5)                   | 0.81   |
| Empirical antibiotic treatment                               | 48 (94)                | 306 (98)                    | 0.11   |
| combination therapy                                          | 16 (33)                | 153 (50)                    | 0.043  |
| $\beta$ -lactam + aminoglycoside                             | 15 (94)                | 136 (89)                    | 1.00   |
| $\beta$ -lactam + glycopeptide                               | 1 (6)                  | 8 (5)                       | 0.60   |
| $\beta$ -lactam + quinolone                                  | 0                      | 6 (4)                       | 1.00   |
| other combinations                                           | 0                      | 3 (2)                       | 1.00   |
| monotherapy                                                  | 32 (67)                | 153 (50)                    | 0.043  |
| $\beta$ -lactam + $\beta$ -lactam inhibitor                  | 21 (66)                | 108 (71)                    | 0.67   |
| carbapenem                                                   | 8 (25)                 | 30 (20)                     | 0.47   |
| oxymino $\beta$ -lactam                                      | 6 (19)                 | 13 (8.5)                    | 0.10   |
| quinolone                                                    | 0                      | 13 (8.5)                    | 0.12   |
| aminoglycoside                                               | 0                      | 3 (2)                       | 1.00   |
| glycopeptide                                                 | 0                      | 3 (2)                       | 1.00   |
| other                                                        | 1 (3)                  | 2 (1)                       | 0.43   |
| Inadequate initial empirical antibiotic therapy <sup>c</sup> | 35 (69)                | 29 (9)                      | <0.001 |
| Time to adequate antibiotic therapy >48 h                    | 21 (41)                | 13 (4)                      | <0.001 |
| ICU admission                                                | 7 (14)                 | 14 (4)                      | 0.023  |
| Invasive mechanical ventilation                              | 7 (14)                 | 10 (3)                      | 0.005  |
| Early case-fatality rate (7 days)                            | 9 (18)                 | 33 (11)                     | 0.15   |
| Overall case-fatality rate (30 days)                         | 20 (39)                | 62 (20)                     | 0.003  |

<sup>a</sup>Catheter-related bacteraemia, 8; skin and soft tissue infection (SSTI), 2; and disseminated infection, 2.

<sup>b</sup>In the MDRGNB group: *Campylobacter jejuni* colitis, 2; invasive pulmonary aspergillosis (IPA), 1; *Clostridium difficile* (CD) colitis, 1; and pneumonia, 1. In the non-MDRGNB group: IPA, 2; CD colitis, 1; neutropenic enterocolitis, 1; disseminated herpes zoster virus infection, 1; SSTI, 1; cytomegalovirus (CMV) colitis, 1; CMV antigenaemia, 1; CMV pneumonitis, 1; catheter-related infection, 1; and aspiration pneumonia, 1.

<sup>c</sup>Nine cases who did not receive any empirical antibiotic therapy were considered to have received inadequate therapy.

**Table 4.** Risk factors for overall mortality by univariate and multivariate analysis

| Risk factor                               | Survived, N=267, n (%) | Died, N=82, n (%) | P      | Adjusted OR (95% CI) | P      |
|-------------------------------------------|------------------------|-------------------|--------|----------------------|--------|
| Male sex                                  | 164 (61)               | 55 (67)           | 0.43   | 1.06 (0.56–2.00)     | 0.84   |
| Age in years, median (range)              | 61 (14–89)             | 66 (23–89)        | 0.043  | 1.02 (0.99–1.05)     | 0.062  |
| Solid tumour                              | 115 (43)               | 56 (68)           | <0.001 | 5.04 (2.49–10.19)    | <0.001 |
| Graft-versus-host disease                 | 4 (1.5)                | 5 (6)             | 0.036  | 5.40 (0.82–35.39)    | 0.079  |
| Other co-morbidities                      | 94 (35)                | 39 (48)           | 0.051  | 0.92 (0.48–1.74)     | 0.80   |
| Polymicrobial bacteraemia                 | 29 (11)                | 15 (18)           | 0.087  | —                    | —      |
| Concomitant infection                     | 10 (4)                 | 7 (8.5)           | 0.085  | —                    | —      |
| Current corticosteroid therapy            | 85 (32)                | 55 (67)           | <0.001 | 4.38 (2.39–8.05)     | <0.001 |
| Statin use                                | 30 (11)                | 6 (7)             | 0.40   | —                    | —      |
| Inadequate empirical antibiotic therapy   | 39 (15)                | 20 (24)           | 0.044  | 1.57 (0.50–4.90)     | 0.43   |
| Time to adequate antibiotic therapy >48 h | 16 (6)                 | 14 (17)           | 0.003  | 2.36 (0.62–8.93)     | 0.20   |
| Shock at presentation                     | 23 (9)                 | 20 (24)           | <0.001 | 1.57 (0.68–3.61)     | 0.28   |
| ICU admission                             | 7 (3)                  | 14 (17)           | <0.001 | 11.40 (3.19–40.74)   | <0.001 |
| invasive mechanical ventilation           | 3 (1)                  | 14 (17)           | <0.001 | —                    | —      |
| MDRGNB                                    | 29 (11)                | 20 (24)           | 0.003  | 3.52 (1.36–9.09)     | 0.009  |

strains were resistant to carbapenems and all other  $\beta$ -lactams. None was a carbapenemase producer. All *P. aeruginosa* and *A. baumannii* strains were resistant to ciprofloxacin and susceptible to amikacin and colistin. *S. maltophilia* strains were only susceptible to co-trimoxazole. In the control group, the GNB isolated were *E. coli* in 159 cases, *P. aeruginosa* in 57 cases, *K. pneumoniae* in 53 cases, *E. cloacae* in 18 cases, *Proteus mirabilis* in 9 cases, *Salmonella enteritidis* in 7 cases, *K. oxytoca* in 5 cases, *E. aerogenes* in 3 cases, *Citrobacter* spp. in 3 cases, *A. hydrophila* in 3 cases, *Serratia marcescens* in 3 cases, *M. morgani* in 2 cases, *Shewanella putrefaciens* in 2 cases, *A. baumannii* in 1 case and *Escherichia fergusonii* in 1 case (38 episodes were polymicrobial).

Clinical features, antibiotic treatment and patient outcomes are detailed in Table 3. When comparing episodes caused by a MDRGNB with those caused by a non-MDRGNB, no differences regarding clinical features at presentation were found. The most frequent focus of bacteraemia was an endogenous source (34% of the episodes), followed by urinary tract (21.5%) and cholangitis (17.6%). The great majority of patients received empirical antibiotic therapy (97.5%), with no differences between groups regarding the antibiotic type received. Patients with MDRGNB bacteraemia more frequently received inadequate initial empirical antibiotic therapy compared with the susceptible control group, and time to adequate antibiotic therapy was longer in this group. Among the patients who received inadequate initial empirical antibiotic therapy, adequate therapy lasted more than 48 h in 21/35 patients (60%) in the MDRGNB group and 13/29 patients (45%) in the non-MDRGNB group. The mean time to adequate therapy was 2.13 days ( $\pm 1.6$  SD) in the MDRGNB group, versus 0.33 days ( $\pm 0.98$  SD) in the non-MDRGNB group,  $P < 0.001$ . Bacteraemia due to a MDR strain was also associated with a poorer outcome, with higher ICU admission, greater need of invasive mechanical ventilation and a higher overall case-fatality rate.

Table 4 summarizes the results of the univariate and multivariate analysis of factors potentially associated with the overall case-fatality rate. After adjustment, independent risk factors for mortality were solid tumour as the underlying

disease (OR 5.04; 95% CI 2.49–10.19), current corticosteroid therapy (OR 4.38; 95% CI 2.39–8.05), ICU admission (OR 11.40; 95% CI 3.19–40.74) and MDRGNB bacteraemia (OR 3.52; 95% CI 1.36–9.09). The goodness-of-fit test of Hosmer and Lemeshow showed good agreement between observed and predicted values of the model ( $P = 0.22$ ).

## Discussion

In this prospective study we found that 13.7% of episodes of bacteraemia in cancer patients were caused by a MDRGNB. This finding is in line with recent studies, which report an increase in antibiotic resistance among GNB in immunocompetent and immunocompromised hosts, including patients with malignancies and HSCT recipients.<sup>11–17</sup>

The identification of risk factors associated with the development of specific types of infection may be an important step forward in predicting infection and in guiding implementation of strategies to decrease its incidence and negative impact. In our study, urinary catheter and previous antibiotic therapy were found to be independent risk factors for MDRGNB bacteraemia. Previous antibiotic therapy has been recognized as a major risk factor for bacterial resistance development,<sup>1,11,12,14,15,18–20</sup> and urinary catheter has also been identified as a risk factor, especially for ESBL production, in non-immunosuppressed patients.<sup>11,20</sup> In our study of cancer patients, this finding may be explained by the high prevalence of ESBL-EC isolates, and also by the notably high number of bloodstream infections originating in the urinary tract (21.5%).

The majority of the MDR isolates were *E. coli*, mostly ESBL producers, followed by *Enterobacter* spp. and *P. aeruginosa*. The most frequent non-MDRGNB were *E. coli*, followed by *P. aeruginosa* and *K. pneumoniae*. This finding is representative of an immunosuppressed population with cancer and frequently associated neutropenia, although it may vary according to the local epidemiology.<sup>12,15,21</sup> We found extensive clonal diversity

among all ESBL-EC isolates, with a clear predominance (74%) of ESBL type CTX-M. These findings have also been described previously by other studies performed in the same geographic area.<sup>1,22</sup>

A relationship between infection with resistant bacteria and poor outcome has been reported in several settings.<sup>17,23–26</sup> In line with these findings, we observed that patients with MDRGNB received inadequate empirical antibiotic therapy more frequently than patients with non-MDRGNB, and time to adequate therapy was also longer in this group. Moreover, patients with MDRGNB bacteraemia had poor outcomes, with frequent ICU admission, need for mechanical ventilation and a high overall case-fatality rate. Although inadequate empirical antibiotic therapy has been related with mortality in GNB bacteraemia,<sup>20,23–27</sup> this association was not found in the present study. A short delay in receiving appropriate antimicrobial therapy does not necessarily lead to an adverse outcome.

Clinical outcomes of patients with bacteraemia may also depend on several factors such as underlying condition, severity of illness, primary site of infection and causative organism.<sup>23</sup> In our study, independent factors influencing mortality were solid tumour, current corticosteroid therapy, ICU admission and MDRGNB bacteraemia. Mortality occurred mainly in debilitated patients with uncontrolled solid tumours who were receiving palliative chemotherapy and corticosteroids in an attempt to mitigate the symptoms caused by the underlying disease.<sup>28</sup> Patients who required ICU admission for severe sepsis or further complications were also more likely to have a poorer outcome.

Treatment options for MDRGNB infections are often limited. Carbapenems are the drugs of choice for infections caused by ESBL-producing microorganisms, but their use may not be appropriate in infections caused by *P. aeruginosa*, *A. baumannii* or *S. maltophilia*, where resistance to carbapenems is increasing.<sup>17</sup> There are very few new antimicrobial agents against MDRGNB. The only new agent with significant *in vitro* activity is tigecycline, a glycylcycline derivative of the tetracycline minocycline, but clinical experience is limited and in fact resistance has already been reported. This drug is not active against *P. aeruginosa* or some strains of MDR *A. baumannii*. Moreover, since it is generally bacteriostatic, its use in cancer patients with neutropenia may not be recommended.

Choosing the initial empirical antibiotic therapy in patients with severe sepsis is often a clinical challenge, especially when a MDR microorganism is suspected. Surveillance data of the geographical area, the institution and the ward may be helpful in order to choose an optimal antibiotic regimen in each case, and antibiotic combinations are usually needed.<sup>29</sup> Cancer patients who present risk factors for MDRGNB infection, such as previous antibiotics and/or urinary catheter, might benefit from an empirical antibiotic therapy comprising a combination of a broad-spectrum  $\beta$ -lactam (e.g. a carbapenem) plus an aminoglycoside or a fluoroquinolone. The lack of new antibiotic options against Gram-negative pathogens underscores the need for optimization of current therapies and prevention of the spread of these organisms.

Despite a number of strengths, our prospective study of a large cohort of bacteraemias has some limitations that should be acknowledged. First, it was performed in a single institution, which may not reflect the epidemiology of different centres

and/or different geographical areas. Second, we analysed a heterogeneous group of MDRGNB that may have different epidemiological and clinical characteristics and behaviours.

In conclusion, we found that bacteraemia caused by MDRGNB is common among cancer patients, especially in those exposed to antibiotic pressure and those carrying a urinary catheter. The most frequent mechanism of resistance was ESBL production (especially by *E. coli*), followed by AMP-c production. Patients with MDRGNB bacteraemia more frequently received inadequate initial antibiotic therapy and had a poorer outcome, with a greater need for ICU admission and a higher overall case-fatality rate. We were unable to establish whether increased mortality in patients with MDRGNB bacteraemia was directly associated with a delay in the appropriate antibiotic. In the absence of new antimicrobial agents against resistant GNB, judicious use of antibiotics and control measures to prevent the development and spread of GNB resistance are needed.

## Funding

This study was co-financed by the European Regional Development Fund 'A way to achieve Europe', the Spanish Network for Research in Infectious Diseases (REIPI RD06/0008) and by research grant 051610 from Fundació la Marató de TV3, Generalitat de Catalunya, Barcelona.

The funding sources had no role in the study design, the collection, analysis and interpretation of the data or the decision to submit the manuscript for publication. Only the authors had full access to the data files for the study. The authors do not have any relationship that may constitute a dual or conflicting interest.

## Transparency declarations

None to declare.

## References

- Gudiol C, Calatayud L, García-Vidal C et al. Bacteremia due to extended-spectrum  $\beta$ -lactamase-producing *Escherichia coli* (ESBL-EC) in cancer patients: clinical features, risk factors, molecular epidemiology and outcome. *J Antimicrob Chemother* 2010; **65**: 333–41.
- Falagas ME, Koletsi PK, Bliziotis IA. The diversity of definitions of multidrug-resistant (MDR) and pandrug-resistant (PDR) *Acinetobacter baumannii* and *Pseudomonas aeruginosa*. *J Med Microbiol* 2006; **55**: 1619–29.
- Friedman ND, Kaye KS, Stout JE et al. Health care-associated bloodstream infections in adults: a reason to change the accepted definition of community-acquired infections. *Ann Intern Med* 2002; **137**: 791–7.
- Marron A, Carratalà J, González-Barca E et al. Serious complications of bacteremia caused by viridans streptococci in neutropenic patients with cancer. *Clin Infect Dis* 2000; **31**: 1126–30.
- Clinical and Laboratory Standards Institute. *Methods for Dilution Antimicrobial Susceptibility Tests for Bacteria That Grow Aerobically, Eighth Edition: Approved Standard M07-A8*. CLSI, Wayne, PA, USA, 2009.
- Clinical and Laboratory Standards Institute. *Performance Standards for Antimicrobial Susceptibility Testing: Twentieth Informational Supplement M100-S20*. CLSI, Wayne, PA, USA, 2010.

- 7 Lee K, Sim YS, Yong D *et al.* Evaluation of the Hodge test and the imipenem-EDTA double-disk synergy test for differentiating metallo- $\beta$ -lactamase-producing isolates of *Pseudomonas* spp. and *Acinetobacter* spp. *J Clin Microbiol* 2003; **41**: 4623–9.
- 8 Fang H, Ataker F, Hedin G *et al.* Molecular epidemiology of extended-spectrum- $\beta$ -lactamases among *Escherichia coli* isolates collected in a Swedish hospital and its associated health care facilities from 2001 to 2006. *J Clin Microbiol* 2008; **46**: 707–12.
- 9 Tenover FC, Arbeit RD, Goering RV *et al.* Interpreting chromosomal DNA restriction patterns produced by pulsed-field gel electrophoresis: criteria for bacterial strain typing. *J Clin Microbiol* 1995; **33**: 2233–9.
- 10 Hosmer DW, Lemeshow S. Logistic regression: variable selection. In: Hosmer DW, Lemeshow S, eds. *Applied Logistic Regression*, 2nd edn. New York, NY: John Wiley & Sons, 2000.
- 11 Rodríguez-Baño J, Picón E, Gijón P. Community-onset bacteremia due to ESBL-EC: risk factors and prognosis. *Clin Infect Dis* 2010; **50**: 40–8.
- 12 Oliveira AL, Souza M, Carvalho-Dias VMH *et al.* Epidemiology of bacteremia and factors associated with multi-drug-resistant Gram-negative bacteremia in hematopoietic stem cell transplant recipients. *Bone Marrow Transplant* 2007; **39**: 775–81.
- 13 Viscoli C, Castagnola E. Treatment of febrile neutropenia: what is new? *Curr Opin Infect Dis* 2002; **15**: 377–82.
- 14 Linares L, Cervera C, Cofán F *et al.* Risk factors for infection with extended-spectrum and AmpC  $\beta$ -lactamase-producing Gram-negative rods in renal transplantation. *Am J Transplant* 2008; **8**: 1000–5.
- 15 Spanik S, Krupova I, Trupl J *et al.* Bacteremia due to multiresistant Gram-negative bacilli in neutropenic cancer patients: a case-controlled study. *J Infect Chemother* 1999; **5**: 180–4.
- 16 Wisplinghoff H, Seifert H, Wenzel RP *et al.* Current trends in the epidemiology of nosocomial bloodstream infections in patients with haematological malignancies and solid neoplasms in hospitals in the United States. *Clin Infect Dis* 2003; **36**: 1103–10.
- 17 Giske CG, Monnet DL, Cars O *et al.* Clinical and economic impact of common multidrug-resistant Gram-negative bacilli. *Antimicrob Agents Chemother* 2008; **52**: 813–21.
- 18 Ronen B-A, Rodríguez-Baño J, Arslan H *et al.* A multinational survey of risk factors for infection with extended-spectrum  $\beta$ -lactamase-producing Enterobacteriaceae in nonhospitalized patients. *Clin Infect Dis* 2009; **49**: 682–90.
- 19 Ohmagari N, Hanna H, Graviss L *et al.* Risk factors for infections with multidrug-resistant *Pseudomonas aeruginosa* in patients with cancer. *Cancer* 2005; **104**: 205–12.
- 20 Ortega M, Marco F, Soriano A *et al.* Analysis of 4758 *Escherichia coli* bacteremia episodes: predictive factors for isolation of an antibiotic-resistant strain and their impact on the outcome. *J Antimicrob Chemother* 2009; **63**: 568–74.
- 21 Garnica M, Maiolino A, Nucci M. Factors associated with bacteremia due to multidrug-resistant Gram-negative bacilli in hematopoietic stem cell transplant recipients. *Braz J Med Biol Res* 2009; **42**: 289–93.
- 22 Rodríguez-Baño J, Navarro MD, Romero L *et al.* Bacteremia due to extended-spectrum  $\beta$ -lactamase-producing *Escherichia coli* in the CTX-M era: a new clinical challenge. *Clin Infect Dis* 2006; **43**: 1407–14.
- 23 Kang CI, Kim SH, Park WB *et al.* Bloodstream infections caused by antibiotic-resistant Gram-negative bacilli: risk factors for mortality and impact of inappropriate initial antimicrobial therapy on outcome. *Antimicrob Agents Chemother* 2005; **49**: 760–6.
- 24 Peña C, Gudiol C, Calatayud L *et al.* Infections due to *Escherichia coli* producing extended-spectrum  $\beta$ -lactamase among hospitalized patients: factors influencing mortality. *J Hosp Infect* 2008; **68**: 116–22.
- 25 Trecarichi EM, Tumbarello M, Spanu T *et al.* Incidence and clinical impact of extended-spectrum- $\beta$ -lactamase (ESBL) production and fluoroquinolone resistance in bloodstream infections caused by *Escherichia coli* in patients with haematological malignancies. *J Infect* 2009; **58**: 299–307.
- 26 Schwaber MJ, Carmeli Y. Mortality and delay in effective therapy associated with extended-spectrum  $\beta$ -lactamase production in Enterobacteriaceae bacteremia: a systematic review and meta-analysis. *J Antimicrob Chemother* 2007; **60**: 913–20.
- 27 Kollef MH. Inadequate antimicrobial treatment: an important determinant of outcome for hospitalized patients. *Clin Infect Dis* 2000; **31**: S131–8.
- 28 González-Barca E, Fernández-Sevilla A, Carratalà J *et al.* Prognostic factors mortality in cancer patients with neutropenia and bacteremia. *Eur J Microbiol Infect Dis* 1999; **18**: 539–44.
- 29 Paterson DL. Impact of antibiotic resistance in Gram-negative bacilli on empirical and definitive antibiotic therapy. *Clin Infect Dis* 2008; **47**: S14–20.
